# Supplementary material for: One-pot polymer–clay composite reversible adhesive
Source: Royal Society of Chemistry journal article supplement (doi:10.1039/d5sm01039j), 2026-01-01
Supplement: d5sm01039j1.pdf [file d5sm01039j1.pdf]

## Electronic Supplementary Information

### One-pot polymer-clay composite reversible adhesive

#### Table of contents

**Table S1.** Solid mass fraction and monomer conversion

**Figure S1.** Particle size of emulsion composites

**Figure S2.** Viscosity of emulsion composites at varying shear rates

**Figure S3.** Sagging processes of representative emulsion composites

**Figure S4.** Emulsion composite films on glass

**Table S2.** Water contact angles for emulsion composite films.

**Figure S5.** Representative scanning electron microscopy images

**Figure S6.** Lap shear tests for representative dual adhesive systems

**Table S3.** Reversibility under static conditions

**Figure S7.** Optical micrographs of substrates before adhesion and after debonding

**Figure S8.** ATR-FTIR spectra of substrates before adhesion and after debonding

**Figure S9.** Equilibrium swelling percentages of emulsion composites

**Table S1.** Solid mass fraction and monomer conversion.

| Sample | Solid mass fraction<br>[%] | Monomer conversion<br>[%] |
|--------|----------------------------|---------------------------|
| A0     | 29.3±0.7                   | 98.4±2.3                  |
| A25    | 29.2±0.5                   | 98.0±1.8                  |
| A50    | 29.3±0.4                   | 98.2±1.2                  |
| A75    | 29.2±0.4                   | 97.7±1.5                  |
| A100   | 29.4±0.5                   | 98.2±1.5                  |
| A125   | 29.4±0.5                   | 98.0±1.8                  |
| A150   | 29.4±0.8                   | 97.9±2.8                  |
| C0     | 22.6±0.8                   | 78.9±2.8                  |
| C25    | 23.6±0.5                   | 82.4±1.8                  |
| C50    | 23.6±0.7                   | 81.9±2.4                  |
| C75    | 23.1±1.2                   | 80.0±4.3                  |
| CPS25  | 23.7±1.0                   | 82.1±3.4                  |
| CPS50  | 23.9±0.9                   | 82.6±3.1                  |
| CPS75  | 24.1±1.2                   | 82.5±4.2                  |

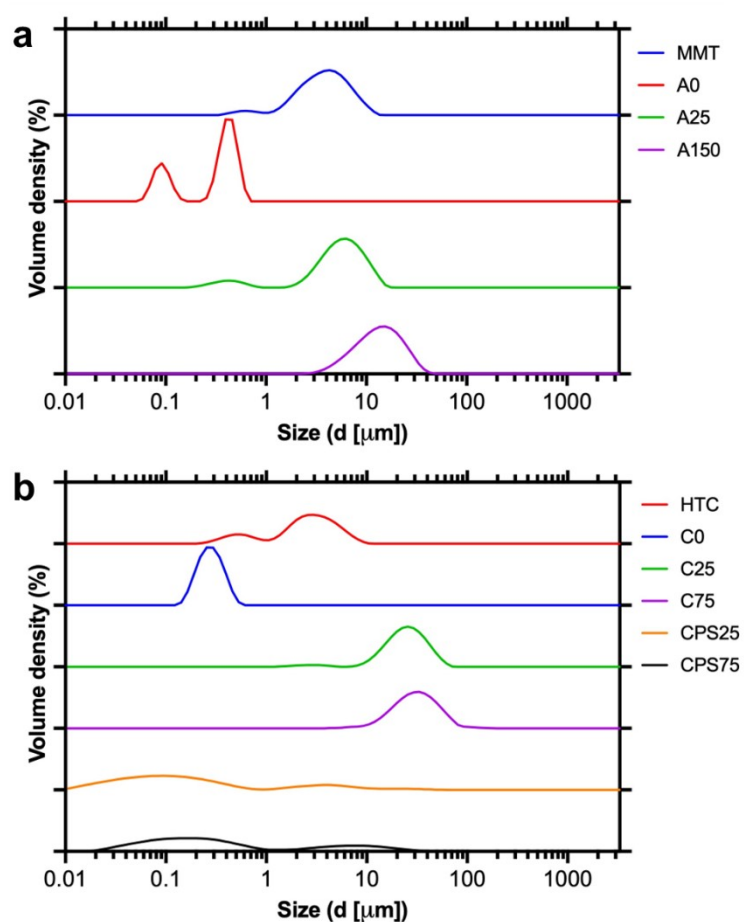

**Figure S1.** Particle size data for **(a)** P(St-BA)/PAA-MMT, and **(b)** P(St-BA)/Chi-HTC and P(St-BA)/Chi-HTC/PS80 emulsion composites.

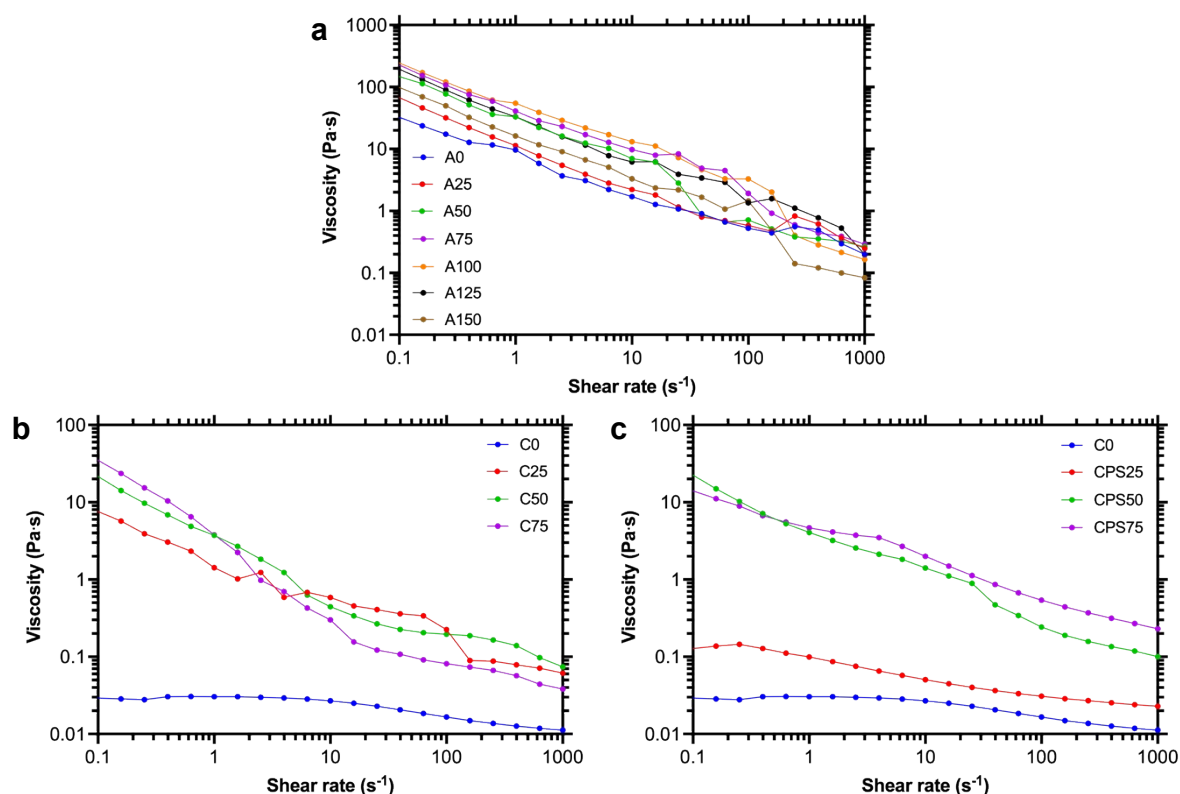

**Figure S2.** Viscosity of (a) P(St-BA)/PAA-MMT, (b) P(St-BA)/Chi-HTC, and (c) P(St-BA)/Chi-HTC/PS80 emulsion composites as a function of shear rate. Instability at higher shear rates might be due to different physical and interfacial mechanisms including wall slip (e.g., sudden drop in viscosity as in A150), droplet deformation, viscous heating, or sample drying.<sup>1-3</sup>

- 1 S. R. Derkach, *Adv. Colloid Interface Sci.*, 2009, **151**, 1–23.
- 2 C. J. Pipe, T. S. Majmudar and G. H. McKinley, *Rheol. Acta*, 2008, **47**, 621–642.
- 3 P. Lehericey, P. Snabre, A. Delots, N. Holten-Andersen and T. Divoux, *J. Rheol.*, 2021, **65**, 427–436.

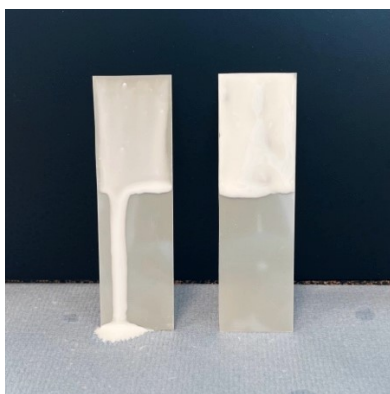

**Figure S3.** Sagging processes of A0 (left) and A100 (right). A volume of 0.2 mL was used on both cases.

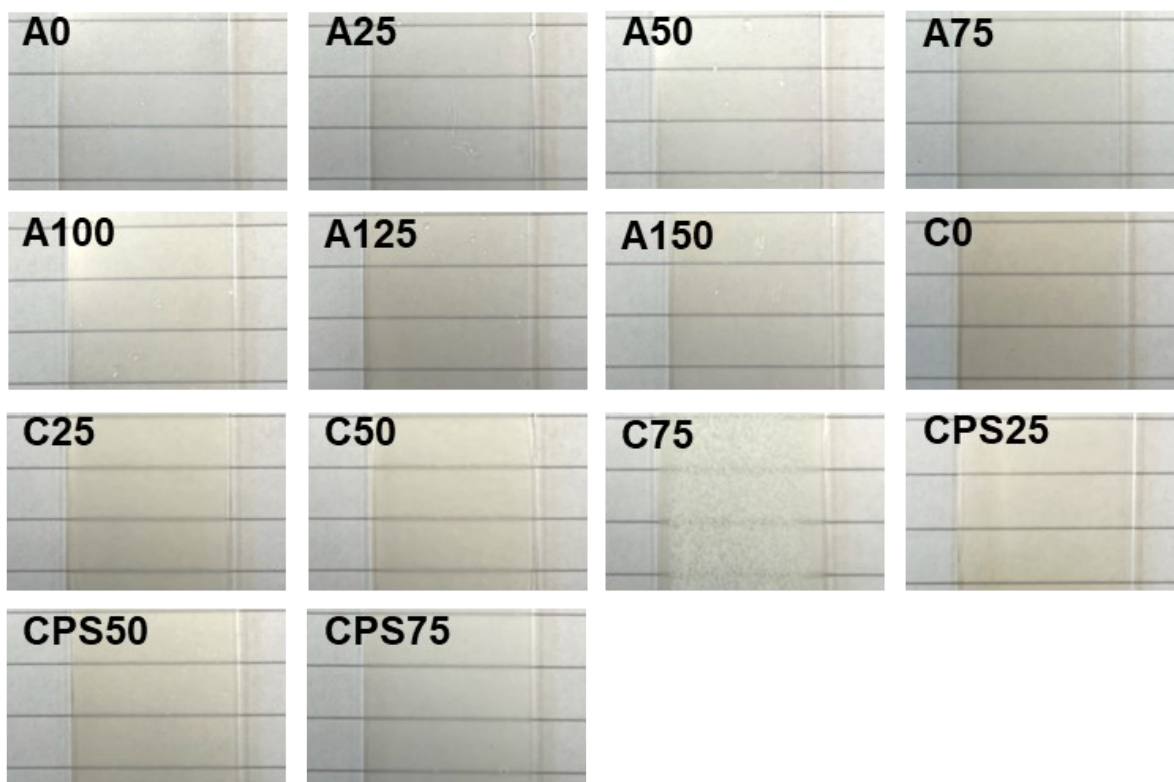

**Figure S4.** Emulsion composite films on glass. The backdrop is 7 mm ruled paper, and all photographs were taken under the same optical conditions.

**Table S2.** Water contact angles for emulsion composite films.

| Sample | HCl pH 1 | Water  | NaOH pH 14 |
|--------|----------|--------|------------|
| A0     | 34.19    | 30.32  | 25.48      |
| A25    | 32.5     | 18.5   | 38.29      |
| A50    | 30.01    | 21.35  | 37.25      |
| A75    | 26.83    | 24.85  | 35.51      |
| A100   | 22.28    | 28.17  | 32.56      |
| A125   | 26.56    | 28.02  | 34.03      |
| A150   | 32.6     | 31.82  | 34.47      |
| C0     | 76.39    | 88.66  | 93.36      |
| C25    | 86.78    | 93.82  | 102.22     |
| C50    | 91.09    | 98.5   | 111.24     |
| C75    | 123.83   | 124.38 | 135.89     |
| CPS25  | 93.65    | 94.61  | 99.18      |
| CPS50  | 71.85    | 71.72  | 87.08      |
| CPS75  | 64.86    | 65.03  | 73.08      |

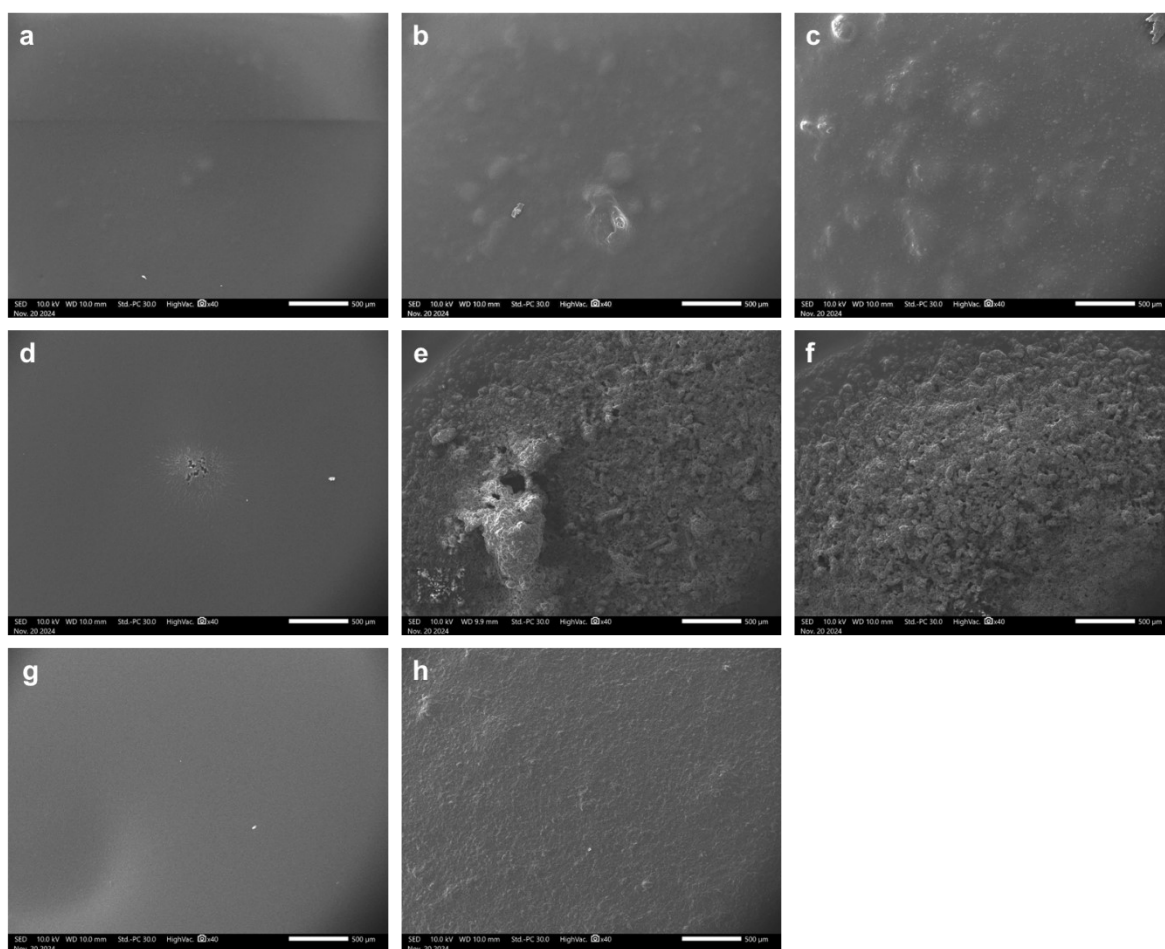

**Figure S5.** Representative scanning electron microscopy images of (a) A0, (b) A25, (c) A150, (d) C0, (e) C25, (f) C75, (g) CPS25, and (h) CPS75.

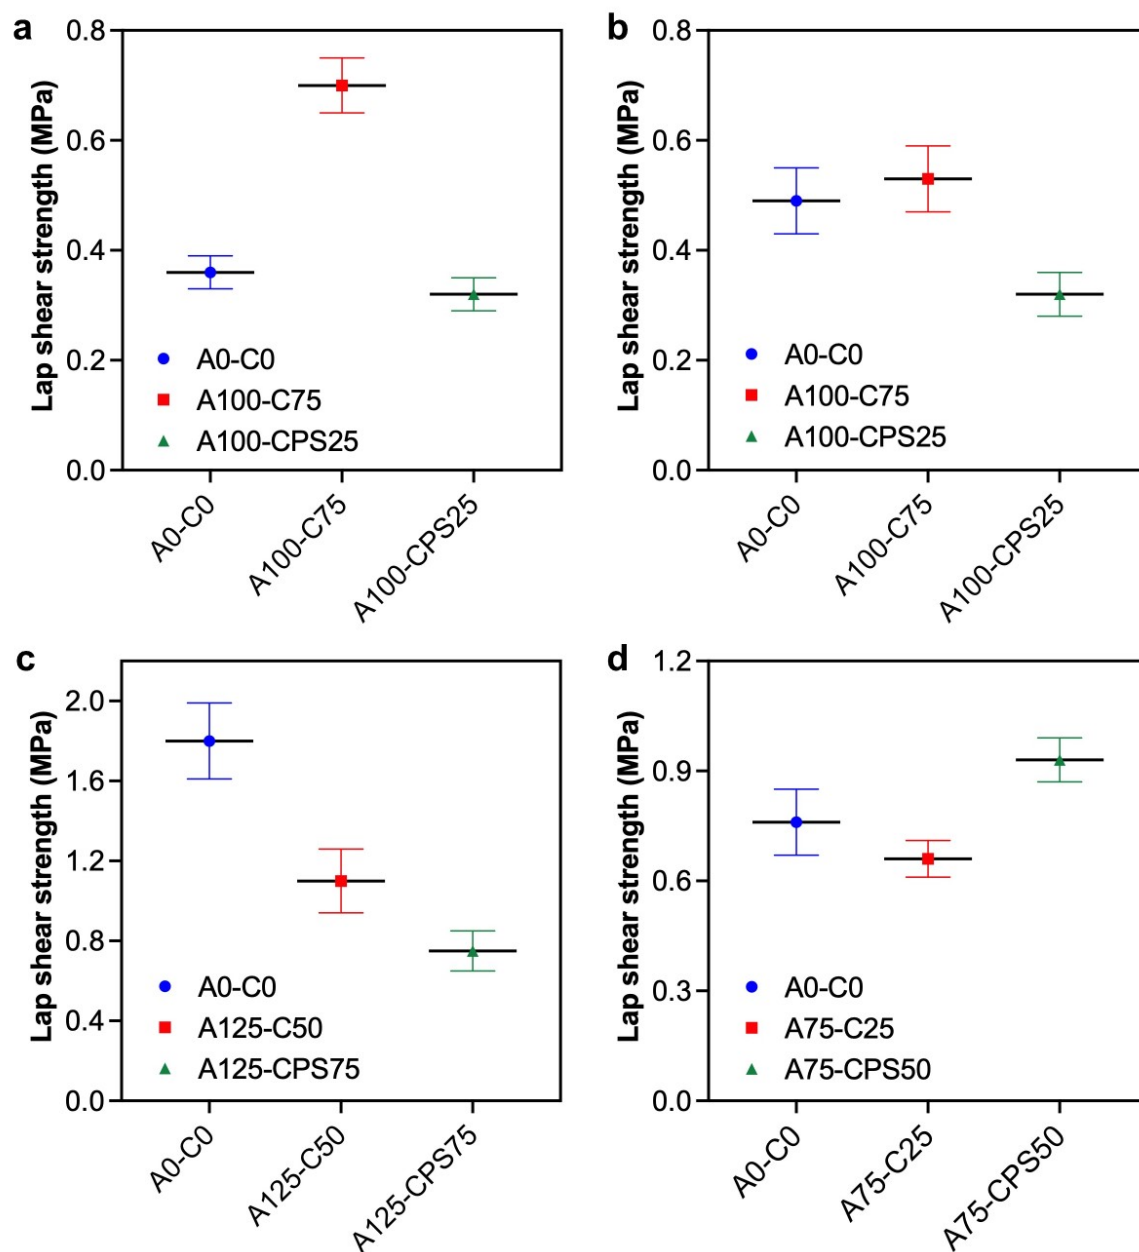

**Figure S6.** Lap shear test results for representative dual adhesive systems on (a) PET, (b) PP, (c) Al, and (d) PC.



**Table S3.** Reversibility under static conditions. An X indicates no detachment was observed. The time indicates how long it takes for the sample to detach.

| PET   | PP    | pH 1 | pH 7 | pH 14 |
|-------|-------|------|------|-------|
| A0    | A0    | X    | X    | X     |
| A25   | A25   | X    | X    | 24 h  |
| A50   | A50   | X    | X    | 24 h  |
| A75   | A75   | X    | X    | 24 h  |
| A100  | A100  | X    | X    | 24 h  |
| A125  | A125  | X    | X    | 24 h  |
| A150  | A150  | X    | X    | 24 h  |
| C0    | C0    | X    | X    | X     |
| C25   | C25   | 48 h | X    | X     |
| C50   | C50   | 48 h | X    | X     |
| C75   | C75   | 24 h | X    | X     |
| CPS25 | CPS25 | 48 h | X    | X     |
| CPS50 | CPS50 | 24 h | X    | X     |
| CPS75 | CPS75 | 24 h | X    | X     |
| C0    | A0    | 48 h | X    | 48 h  |
| A0    | C0    | 48 h | X    | 48 h  |
| C75   | A100  | 24 h | X    | 24 h  |
| A100  | C75   | 24 h | X    | 24 h  |
| CPS25 | A100  | 24 h | X    | 24 h  |
| A100  | CPS25 | 24 h | X    | 24 h  |

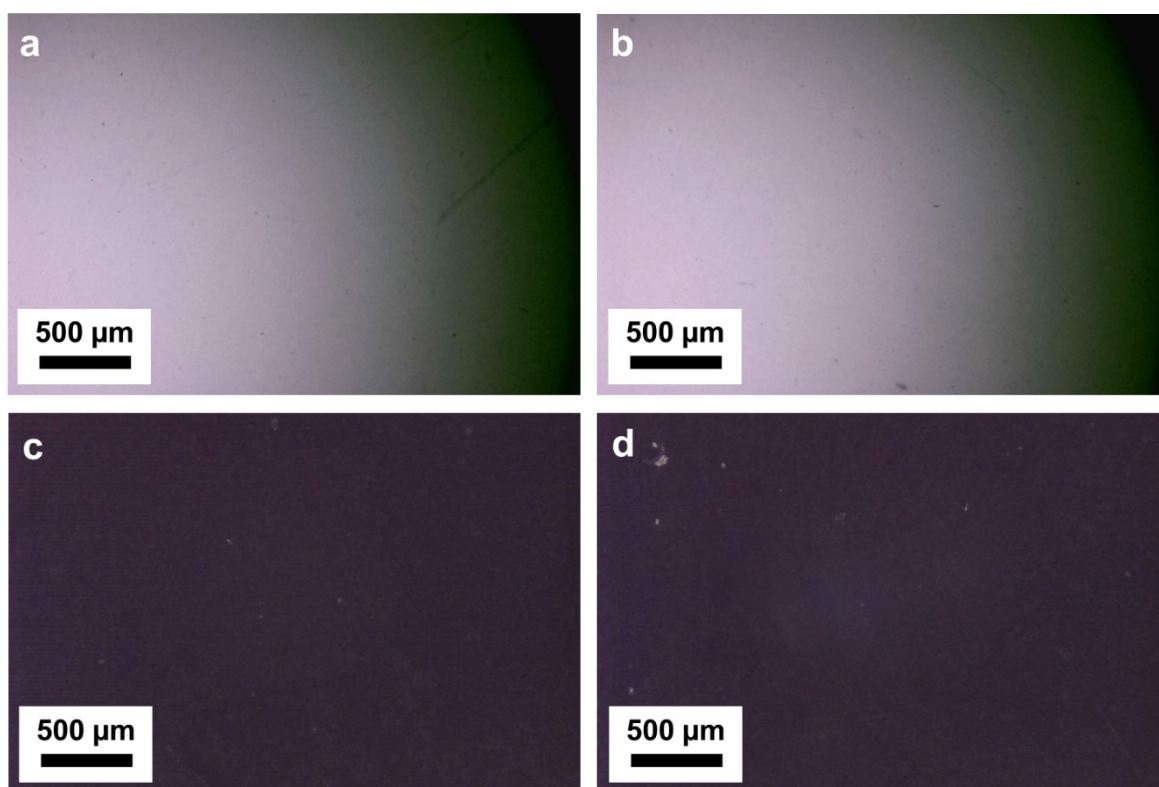

**Figure S7.** Optical micrographs of substrates: (a) as-received PET, (b) PET after debonding of sample A100, (c) as-received PP, and (d) PP after debonding of sample A100.

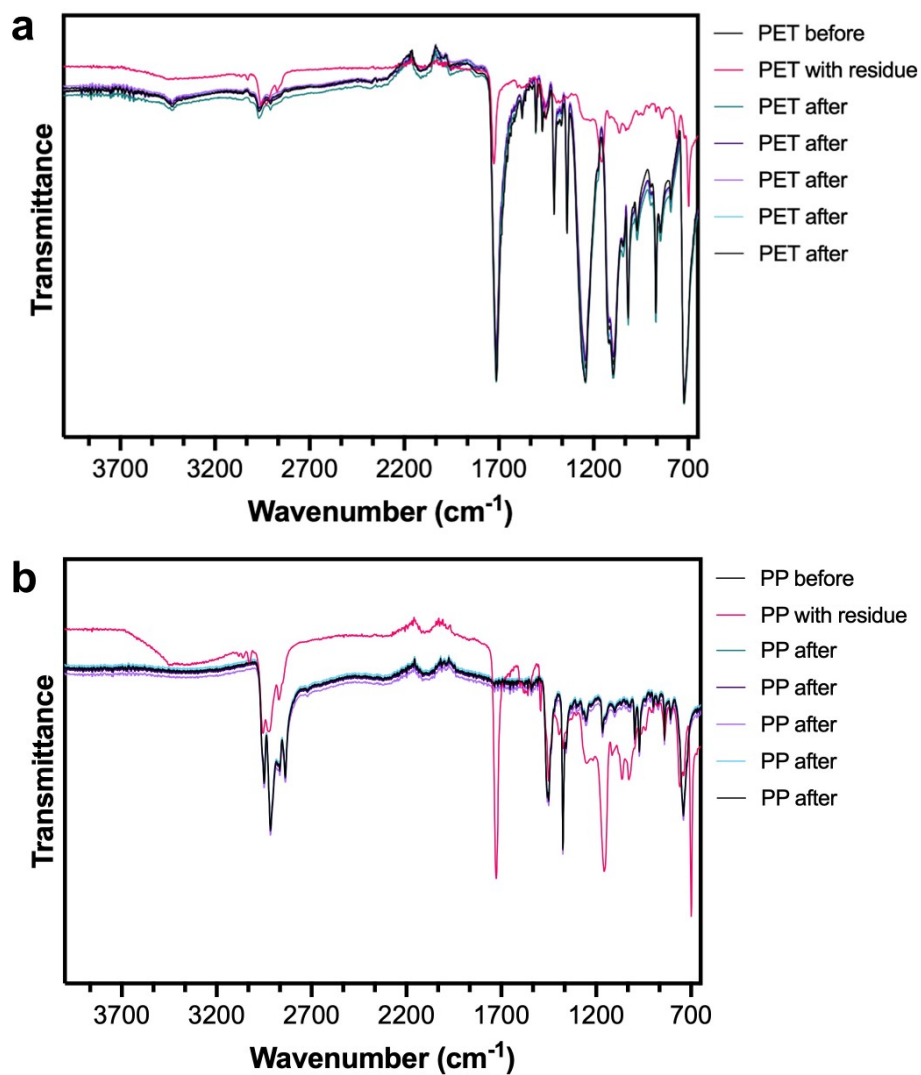

**Figure S8.** ATR-FTIR spectra of (a) PET and (b) PP substrates. Data shows plastic films before adhesion with the A100 formulation, at five random locations after detachment in alkaline solution, and where adhesive residue was observed due to mechanical failure.

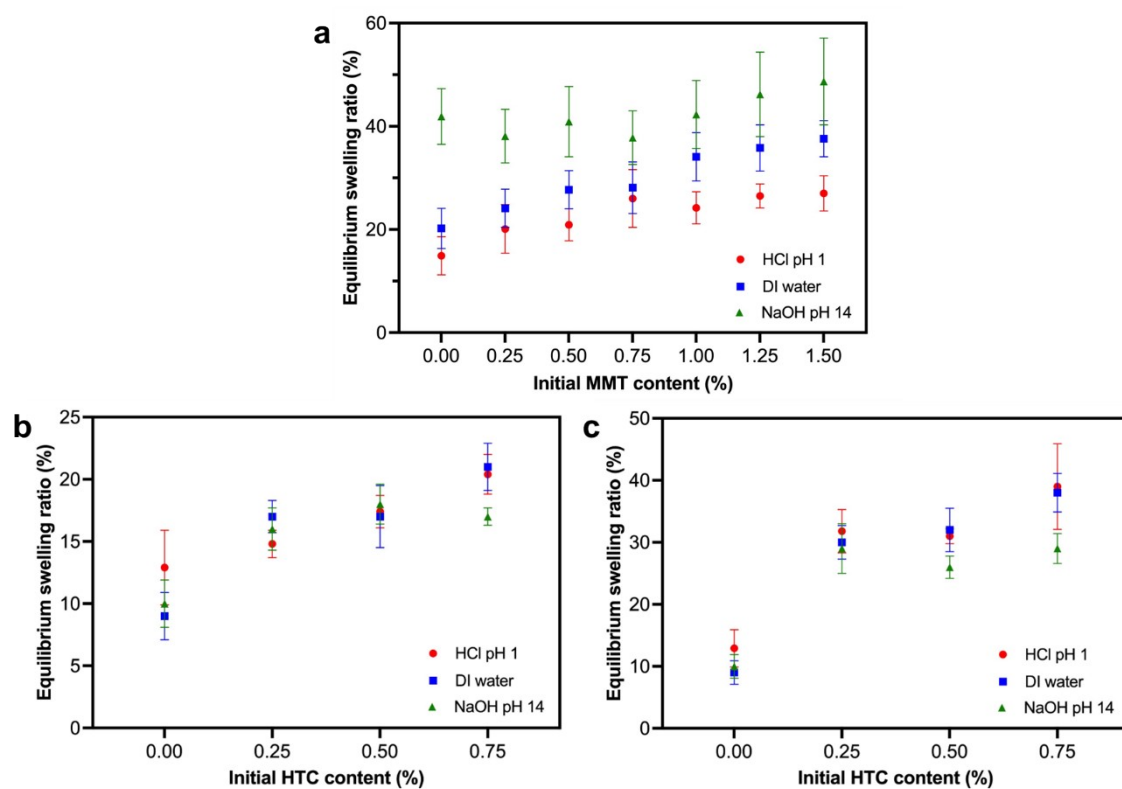

**Figure S9.** Equilibrium swelling percentages of (a) P(St-BA)/PAA-MMT, (b) P(St-BA)/Chi-HTC, and (c) P(St-BA)/Chi-HTC/PS80 emulsion composite films.
